# Supplementary material for: Antimicrobial Resistance in <em>Lactococcus </em>spp. Isolated from Native Brazilian Fish Species: A Growing Challenge for Aquaculture
Source: Preprints.org preprint supplement (doi:10.20944/preprints202410.2381.v1), 2024-10-30
Supplement: Supplementary file 1 [file supplementary]

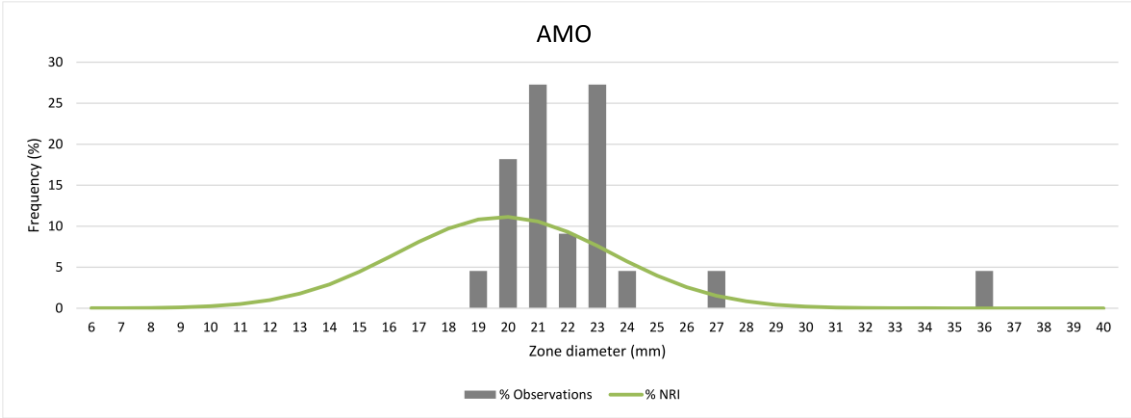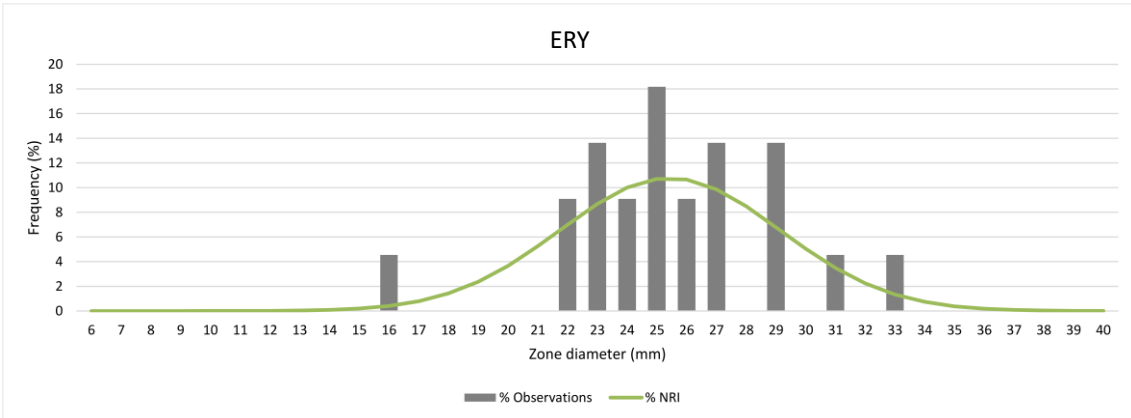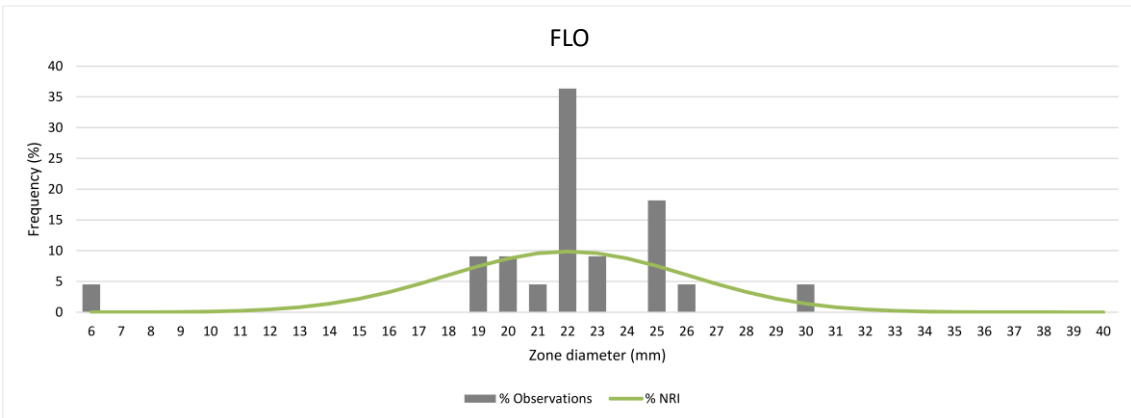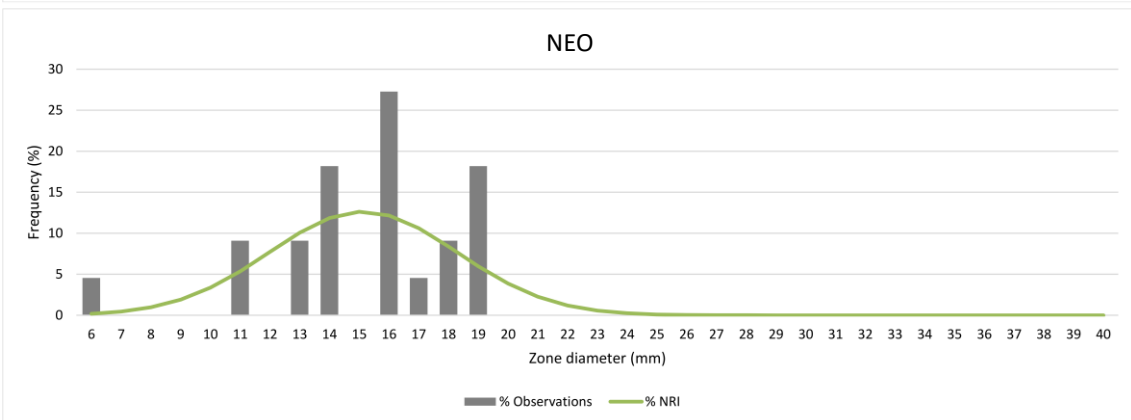

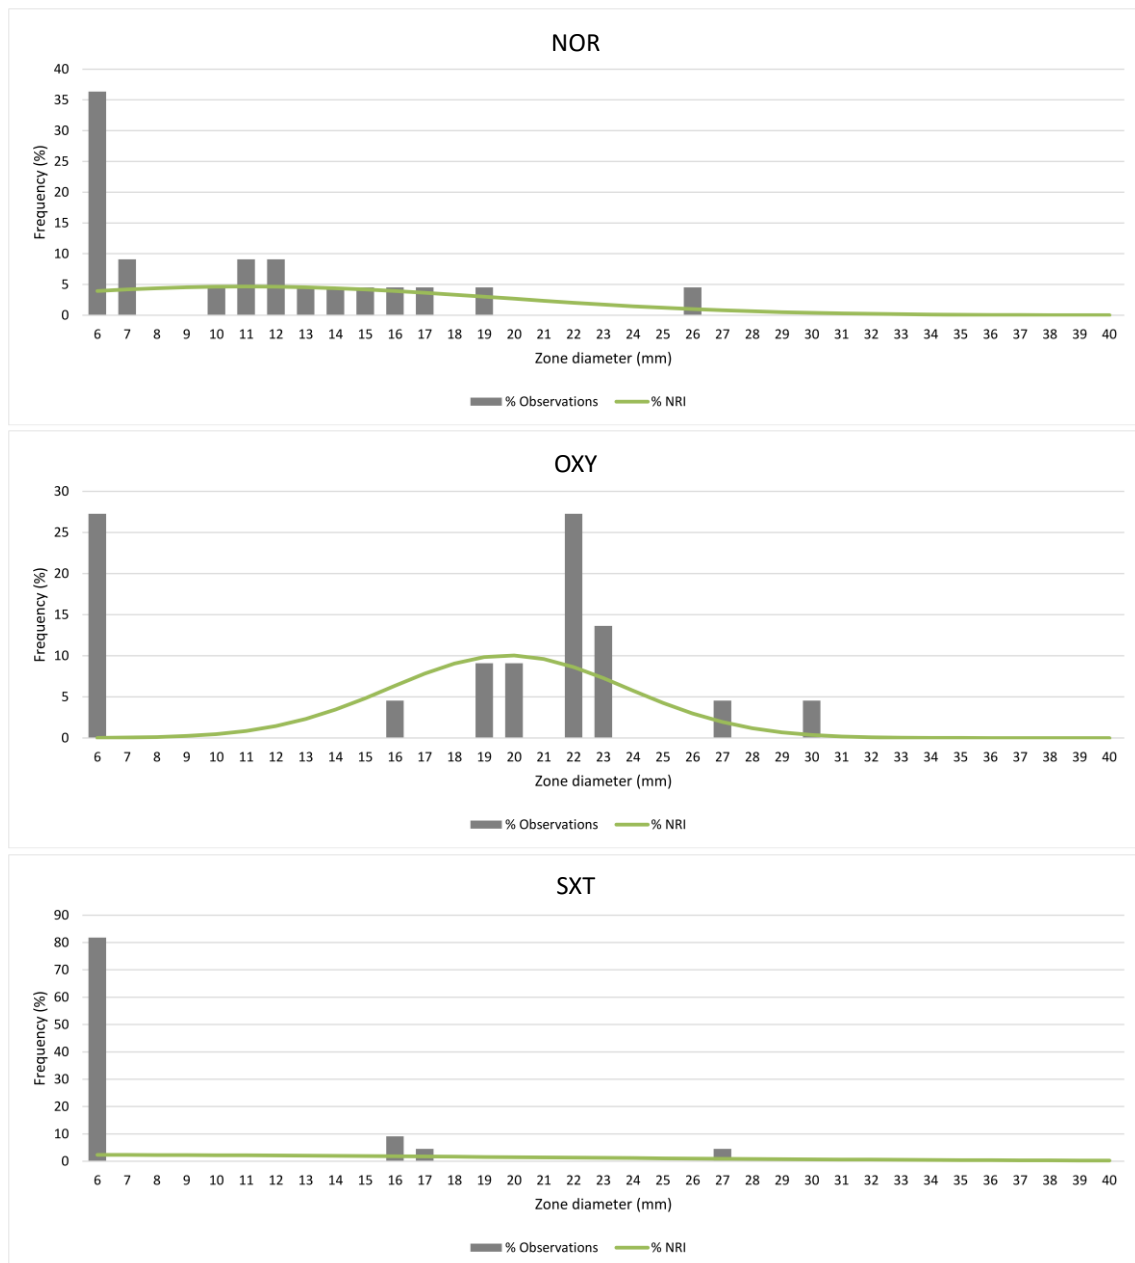

Supplementary Figure S1. Histograms of the inhibition zone for *Lactococcus garvieae* strains against amoxicillin (AMO), erythromycin (ERY), florfenicol (FLO), neomycin (NEO), norfloxacin (NOR), oxytetracycline (OXY) and trimethoprim/sulfamethoxazole (SXT).
