# Supplementary material for: Antimicrobial Resistance in <em>Lactococcus </em>spp. Isolated from Native Brazilian Fish Species: A Growing Challenge for Aquaculture
Source: Preprints.org preprint supplement (doi:10.20944/preprints202410.2381.v1), 2024-10-30
Supplement: Supplementary file 1 [file supplementary]

Supplementary Table 1. Inhibition zones diameters (mm) of antimicrobial agents against *Lactococcus* spp.strains determined using disk diffusion susceptibility assay and MAR index calculated per isolate

| Strain | Species | AMO | OXY | FLO | NOR | SXT | ERY | NEO | MARi |
| --- | --- | --- | --- | --- | --- | --- | --- | --- | --- |
| 167/23-02* | *L. formosensis* | 26 | 6 | 28 | 6 | 6 | 30 | 16 | 0,428571 |
| 167/23-06* | *L. formosensis* | 21 | 6 | 24 | 6 | 6 | 23 | 15 | 0,428571 |
| 167/23-09* | *L. formosensis* | 24 | 6 | 24 | 6 | 6 | 29 | 16 | 0,428571 |
| 52MS | *L. formosensis* | 26 | 26 | 27 | 6 | 6 | 20 | 16 | 0,285714 |
| AM-LG05 | *L. formosensis* | 25 | 8 | 27 | 6 | 6 | 27 | 10 | 0,285714 |
| LG91-23* | *L. formosensis* | 20 | 6 | 6 | 6 | 6 | 27 | 17 | 0,571429 |
| 177* | *L. garvieae* | 20 | 6 | 6 | 6 | 6 | 16 | 16 | 0,571429 |
| 31MS | *L. garvieae* | 20 | 20 | 20 | 6 | 6 | 24 | 11 | 0,285714 |
| CRBP138 | *L. garvieae* | 21 | 22 | 22 | 12 | 6 | 25 | 14 | 0,142857 |
| CRBP144 | *L. garvieae* | 21 | 22 | 23 | 6 | 6 | 29 | 14 | 0,285714 |
| CRBP53 | *L. garvieae* | 21 | 16 | 20 | 6 | 6 | 23 | 13 | 0,285714 |
| CRBP54 | *L. garvieae* | 27 | 27 | 26 | 7 | 6 | 31 | 11 | 0,142857 |
| LG09-14 | *L. garvieae* | 21 | 6 | 19 | 10 | 6 | 23 | 17 | 0,285714 |
| LG10-14 | *L. garvieae* | 20 | 19 | 22 | 6 | 6 | 25 | 16 | 0,285714 |
| LG23-16 | *L. garvieae* | 23 | 6 | 22 | 7 | 6 | 25 | 19 | 0,285714 |
| LG63-21* | *L. garvieae* | 21 | 6 | 23 | 6 | 6 | 25 | 14 | 0,428571 |
| LG66-22 | *L. garvieae* | 19 | 6 | 19 | 11 | 6 | 22 | 13 | 0,285714 |
| LG88-23 | *L. garvieae* | 21 | 20 | 21 | 6 | 6 | 27 | 16 | 0,285714 |
| LG89-23 | *L. garvieae* | 23 | 22 | 22 | 11 | 6 | 29 | 16 | 0,142857 |
| LG114-23 | *L. garvieae* | 20 | 23 | 25 | 19 | 16 | 23 | 19 | 0 |
| LG116-23 | *L. garvieae* | 23 | 22 | 25 | 16 | 6 | 29 | 19 | 0,142857 |
| LG119-24 | *L. garvieae* | 23 | 23 | 22 | 13 | 16 | 26 | 18 | 0 |
| PA-LG01 | *L. garvieae* | 22 | 19 | 22 | 6 | 6 | 22 | 14 | 0,285714 |
| 14MS | *L. petauri* | 25 | 26 | 28 | 6 | 6 | 31 | 15 | 0,285714 |
| 167/23-03* | *L. petauri* | 18 | 6 | 26 | 6 | 6 | 27 | 15 | 0,428571 |
| 167/23-04* | *L. petauri* | 23 | 6 | 27 | 12 | 6 | 28 | 13 | 0,428571 |
| 167/23-05 | *L. petauri* | 26 | 6 | 24 | 13 | 6 | 28 | 12 | 0,285714 |
| 167/23-07* | *L. petauri* | 26 | 6 | 28 | 10 | 6 | 28 | 16 | 0,428571 |
| 167/23-08 | *L. petauri* | 24 | 6 | 25 | 13 | 6 | 28 | 12 | 0,285714 |
| 167/23-10* | *L. petauri* | 22 | 6 | 23 | 12 | 6 | 27 | 13 | 0,428571 |
| 176* | *L. petauri* | 20 | 6 | 6 | 6 | 6 | 17 | 17 | 0,714286 |
| 86* | *L. petauri* | 18 | 6 | 6 | 6 | 6 | 6 | 15 | 0,714286 |
| 89-2* | *L. petauri* | 15 | 9 | 6 | 6 | 6 | 8 | 16 | 0,857143 |
| 93* | *L. petauri* | 18 | 6 | 6 | 6 | 6 | 6 | 16 | 0,714286 |
| AM-LG02* | *L. petauri* | 22 | 20 | 22 | 6 | 6 | 23 | 14 | 0,428571 |
| AM-LG03* | *L. petauri* | 18 | 20 | 20 | 10 | 13 | 22 | 14 | 0,428571 |
| AM-LG07* | *L. petauri* | 19 | 20 | 19 | 6 | 6 | 27 | 16 | 0,571429 |
| AM-LG08* | *L. petauri* | 20 | 20 | 21 | 12 | 6 | 22 | 17 | 0,571429 |
| CRBP146* | *L. petauri* | 21 | 23 | 19 | 12 | 6 | 23 | 14 | 0,428571 |
| CRBP89* | *L. petauri* | 23 | 21 | 21 | 8 | 6 | 27 | 16 | 0,428571 |
| CRBP98* | *L. petauri* | 17 | 19 | 16 | 11 | 6 | 19 | 11 | 0,714286 |
| LG03-18* | *L. petauri* | 19 | 22 | 23 | 6 | 6 | 22 | 16 | 0,571429 |
| LG86-23* | *L. petauri* | 21 | 20 | 21 | 6 | 6 | 27 | 13 | 0,428571 |
| LG94-23* | *L. petauri* | 20 | 6 | 19 | 8 | 6 | 23 | 16 | 0,571429 |
| LG104-23* | *L. petauri* | 20 | 20 | 18 | 12 | 6 | 21 | 12 | 0,714286 |
| LG106-23* | *L. petauri* | 21 | 22 | 22 | 12 | 6 | 25 | 12 | 0,428571 |
| LG117-23* | *L. petauri* | 24 | 8 | 26 | 6 | 6 | 28 | 18 | 0,428571 |

Abbreviations: AMO: amoxicillin, OXY: oxytetracycline, FLO: florfenicol, NOR: norfloxacin, SXT: trimethoprim/sulfamethoxazole, ERY: erythromycin, NEO: neomycin, MARi: multiple antibiotic resistance index, * multidrug-resistant strain

Boxes in yellow show isolates classified as NWT, according to the ECV established or that did not present an inhibition zone for the antimicrobials.
